# Supplementary material for: Functional and evolutionary analysis of Korean bob-tailed native dog using whole-genome sequencing data
Source: PubMed Central journal article supplement (PMC5725459; doi:10.1038/s41598-017-17817-w), 2017-12-11
Supplement: 41598_2017_17817_MOESM1_ESM.pdf [file 41598_2017_17817_MOESM1_ESM.pdf]

## Supplementary Figures

### **Functional and evolutionary analysis of Korean bob-tailed native dog using whole-genome sequencing data**

Daehwan Lee<sup>1,‡</sup>, Dajeong Lim<sup>2,‡</sup>, Daehong Kwon<sup>1</sup>, Juyeon Kim<sup>1</sup>, Jongin Lee<sup>1</sup>, Mikang Sim<sup>1</sup>, Bong-Hwan Choi<sup>2</sup>, Seog-Gyu Choi<sup>3</sup>, and Jaebum Kim<sup>1,\*</sup>

<sup>1</sup>Department of Biomedical Science and Engineering, Konkuk University, Seoul, 05029, South Korea

<sup>2</sup>National Institute of Animal Science, Wanju, 55365, South Korea

<sup>3</sup>Institute of Conservation Gyeongju Donggyeong Dog, Dongguk University, Gyeongju 38170, South Korea

\*jbkim@konkuk.ac.kr

‡These authors contributed equally to this work.

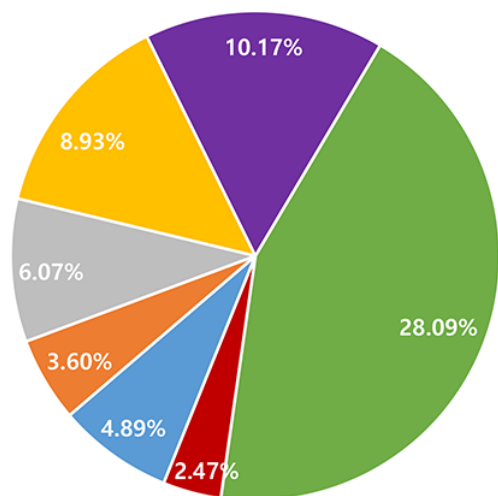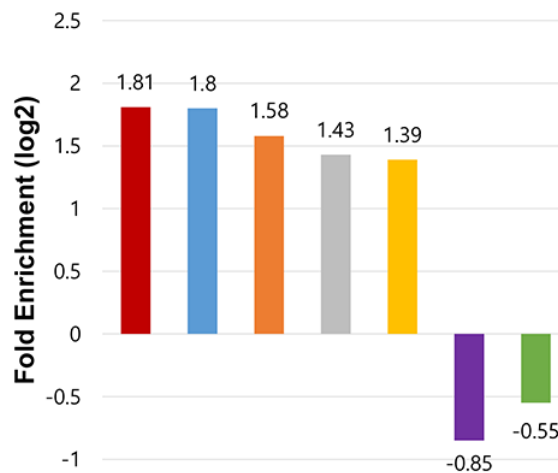

- sensory perception of chemical stimulus (GO:0007606)
- sensory perception of smell (GO:0007608)
- sensory perception (GO:0007600)
- neurological system process (GO:0050877)
- system process (GO:0003008)
- metabolic process (GO:0008152)
- cellular protein modification process (GO:0006464)

**Supplementary Figure 1. Enriched functions in biological process of 1,814 Donggyeong dog-specific genes.** The pie chart and bar graph represent the ratio of Donggyeong dog-specific genes in each enriched function and fold enrichment, respectively.

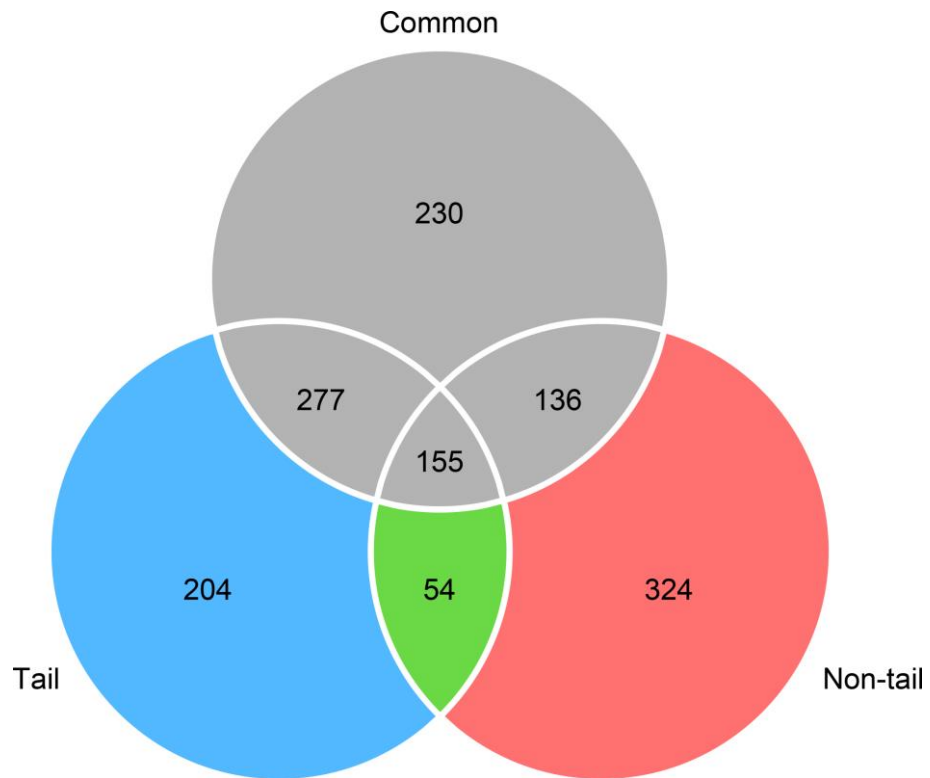

**Supplementary Figure 2. Venn diagram of the top 5% proteins in tail-specific, non-tail-specific, and common extended protein sets.**
